# Supplementary material for: COVID-19 vaccination willingness among people with multiple sclerosis
Source: PubMed Central journal article supplement — Mult Scler J Exp Transl Clin. 2021 May 31;7(2):20552173211017159. doi: 10.1177/20552173211017159 (PMC8172949; doi:10.1177/20552173211017159), 2021-05-31
Supplement: sj-pdf-2-mso-10.1177_20552173211017159.pdf [file sj-pdf-2-mso-10.1177_20552173211017159.pdf]

**Supplemental Table. Survey answer choices to select from in response to vaccine willingness.**

|                                                                                                                |                                                                                                  |
|----------------------------------------------------------------------------------------------------------------|--------------------------------------------------------------------------------------------------|
| <p>Would you be willing to get vaccinated against COVID-19 if a vaccine was available for you?</p>             | <p>Survey answer choices to select from (maximum of 3 may be selected)</p>                       |
| <p>If respondent answered “Yes, I would be willing to get vaccinated against COVID-19”</p>                     | <p>To protect myself from getting COVID-19</p>                                                   |
|                                                                                                                | <p>To decrease the chance of getting seriously ill from COVID-19</p>                             |
|                                                                                                                | <p>To protect my loved ones from getting COVID-19</p>                                            |
|                                                                                                                | <p>To protect others who are unable to get the vaccine because of health conditions</p>          |
|                                                                                                                | <p>To prevent any MS complications related to COVID-19</p>                                       |
|                                                                                                                | <p>Because my MS medication makes me vulnerable to COVID-19</p>                                  |
| <p>If respondent answered “No, I would not be willing to get vaccinated against COVID-19”</p>                  | <p>I’m concerned about potential side effects</p>                                                |
|                                                                                                                | <p>I’m concerned about interaction between the vaccine and my MS medications</p>                 |
|                                                                                                                | <p>I’m concerned that the vaccine will worsen my MS disease and/or symptoms</p>                  |
|                                                                                                                | <p>I’ve had an allergic reaction to a component of vaccines in the past</p>                      |
|                                                                                                                | <p>I am against vaccination in general</p>                                                       |
|                                                                                                                | <p>I’m concerned that the vaccine was developed too rapidly</p>                                  |
|                                                                                                                | <p>It’s best to let nature take its course</p>                                                   |
|                                                                                                                | <p>I don’t think that COVID-19 is dangerous to my health</p>                                     |
|                                                                                                                | <p>I’m afraid of injections</p>                                                                  |
|                                                                                                                | <p>I believe natural or traditional remedies are superior to vaccines</p>                        |
|                                                                                                                | <p>I believe that vaccines contain poisons/toxins/contaminants</p>                               |
|                                                                                                                | <p>I believe vaccination policies are motivated by profit</p>                                    |
|                                                                                                                | <p>I believe information about vaccine side effects are withheld from the public</p>             |
|                                                                                                                | <p>Religious reasons</p>                                                                         |
|                                                                                                                | <p>I think that people without MS should get the vaccine before people with MS</p>               |
|                                                                                                                | <p>I think the vaccine may have been rushed and would like more evidence to prove it is safe</p> |
| <p>I’m concerned about exposure to a public space (e.g. healthcare office) in order to receive the vaccine</p> |                                                                                                  |
| <p>I have previously tested positive for COVID and am likely immune</p>                                        |                                                                                                  |

|                                                                                               |                                                                                                                              |
|-----------------------------------------------------------------------------------------------|------------------------------------------------------------------------------------------------------------------------------|
|                                                                                               | Other (please specify)                                                                                                       |
| If respondent answered “I am unsure if I would be willing to get vaccinated against COVID-19” | I think that people without MS should get the vaccine before people with MS due to concerns about safety for people with MS  |
|                                                                                               | I think political pressure rushed the vaccine trials and it should be tested more thoroughly to prove it is safe             |
|                                                                                               | I would like it to be proven safe on a large-scale, population level to prove it is safe before I take it                    |
|                                                                                               | I'm concerned about exposure to a public space (e.g. healthcare office) in order to receive the vaccine                      |
|                                                                                               | Even if my doctor recommends it, I would like to assess the data that shows it is safe/effective prior to taking the vaccine |
|                                                                                               | Other (please specify)                                                                                                       |
